# Supplementary material for: Evolution of genome structure in the Drosophila simulans species complex
Source: Genome Res. 2021 Mar;31(3):380–96. doi: 10.1101/gr.263442.120 (PMC7919458; doi:10.1101/gr.263442.120)
Supplement: Supplemental Material [file supp_gr.263442.120_supplemental_Table_S16.xlsx]

## Sheet: Sheet1
Table S16. The manually corrected misassemblies in the sim-complex species.
Species	Evidence of misassembly	Cause	Correction Applied	Names of affected sequences before curation	Names of affected sequences in final assembly
D. sechellia	Tbh is not a pseudogene in transcriptome data	1.688 satellite misjoining	Splitting contig Segkk402 at position 676,638 permits the scaffolding step to restore a functional gene structure	Segkk402	Segkk402_part1, Segkk402_part2
D. sechellia	Cytological evidence has shown that Muller elements F and C are not fused in the sim-complex	misjoin in a transposon region	Split contig Segkk311 at position 1,220,104, separating Muller elements C and F	Segkk311	Segkk311_part1, Segkk311_part2
D. sechellia	Mitochondria was missing in Dsech assembly	-	Mitochondrial reads enriched by mapping to existing mitochondrial sequence; The reads are then assembled separately (see Methods)	NA	mito
D. sechellia	Incomplete Wolbachia-derived contigs in the assembly	-	Wolbachia reads enriched by mapping to existing Wolbachi assembly; The reads are then assembled separately (see Methods)	Segkk253 and Segkk257	Wol
D. mauritiana	Missing one 3Rhet region present in tig00000102 after reconciling assemblies	Merging process removed tig00000102, which contains this region	Introduced missing contig from the original (canu) assembly, tig00000102	NA	tig00000102
D. mauritiana	Mitochondrial contig is inconsistent with other mitochondrial genomes from this and related species in being too long and containing duplicated regions	Assembly algorithms tuned for linear chromosomes often introduce such misassemblies	Mitochondria assembled separately from raw reads mapping to existing mitochondrial sequence (see Methods)	Segkk134	dmau-mito
D. mauritiana	Missing Wolbachia assembly after reconciling assemblies	Merging process removed tig00000056, which contained the Wolbachia assembly	Added Wolbachia assembly from the original (canu) assembly, tig00000056	NA	Wolbachia
D. simulans	Redundant contig	Merging process created a redundant contig	Removed Segkk268	Segkk268	NA
D. simulans	Mitochondria contig is too long and contains duplicate of the same sequence	Assembly algorithms tuned for linear chromosomes often introduce such misassemblies for circular chromosomes	Removed the duplicate	Segkk248	NA
D. simulans	A contig with Y-derived sequence on 3R, but there is no evidence of chromosome fusions in the sim-complex	misjoining in a transposon region	Split contig Segkk323 at position 445,528	Segkk323	Segkk66 and Segkk91
	*Original misassembled contigs are available on GitHub at https://github.com/mahulchak/sim-complex
